# Supplementary material
Source: publisher figshare collection journal article supplement (https://tandf.figshare.com/ndownloader/files/21616059)
Supplement: Supplementary file 1 [file 21616059]

## Supplementary material

### Chemical composition of the leaf oils from two morphotypes of *Psidium cattleianum* at four phenological stages

Cintia H. Rocha<sup>a</sup>, Cristian Soldi<sup>b\*</sup>, Pedro Boff<sup>c</sup> and Mari I. C. Boff<sup>a</sup>

<sup>a</sup>*Departamento de Agronomia, Universidade do Estado de Santa Catarina, Centro de Ciências Agroveterinárias, Lages – SC, Brazil;* <sup>b</sup>*Departamento de Ciências Naturais e Sociais, Universidade Federal de Santa Catarina – Campus de Curitibanos, Curitibanos – SC, Brazil;* <sup>c</sup> *Empresa de Pesquisa Agropecuária e Extensão Rural de Santa Catarina (EPAGRI), Estação Experimental de Lages, Lages – SC, Brazil.*

\*corresponding author: email: [cristian.soldi@ufsc.br](mailto:cristian.soldi@ufsc.br)

**Abstract:** The chemical composition of volatile oil extracted from leaves of two morphotypes of *Psidium cattleianum* Sabine from southern Brazil was evaluated at four phenological stages. In addition, plant material was evaluated at four different locations of the Planalto Serrano Region of Santa Catarina state, Brazil. Major components found were: 1,8-cineole,  $\alpha$ -pinene,  $\alpha$ -eudesmol, (E)-caryophyllene and *p*-cymene in red morphotype whereas 1,8-cineole,  $\alpha$ -pinene, myrcene, (E)-caryophyllene and valerianol were found in the yellow morphotype. The differences observed in the chemical composition in red and yellow morphotypes may help in the differentiation between the two morphotypes in the absence of fruits. Also, important differences were observed mainly for 1,8-cineole and  $\alpha$ -pinene percentage at different phenological stages.

## 1. Experimental

### 1.1. Plant material

Leaves from both morphotypes of *Psidium cattleianum* were collected at four different locations of the Planalto Catarinense region of Santa Catarina State. Three places around Lages municipality (EPAGRI - EP; Morro Grande - MG; Pedras Brancas – PB) and one place in Bom Retiro municipality (BR) (see table S1 and figure S1 and S2 for geographical coordinates and edaphic factors). For each location, leaves were collected in different phenological stages named as old leaves/leaf-fall (OL; June and August 2017), young leaves/flower buds (YL; October and November 2017), flowering (FL; November and December 2017) and fruiting (FR; February and March 2017) (Figure S2 and table S1). Plants were randomly selected, and the same individuals were used for all collections.

Table S1 – Geographical coordinates and altitude for local of collection.

| Location            | Geographical coordinates      | Altitude (m) | Soil Classification                                                                                     |
|---------------------|-------------------------------|--------------|---------------------------------------------------------------------------------------------------------|
| EPAGRI (EP)         | 27°49'53,13''S; 50°19'31,9''W | 945          | The Cambisols (WRB/FAO) are acid with low rate of base saturation and high values of Al <sup>3+</sup> . |
| Morro Grande (MG)   | 27°49'53,2''S; 50° 9'32,6''W  | 912          |                                                                                                         |
| Pedras Brancas (PB) | 27°51'53,0''S; 50°12'51,0''W  | 903          |                                                                                                         |
| Bom Retiro (BR)     | 27°50'02,7''S; 49°32'04,8''W  | 832          |                                                                                                         |

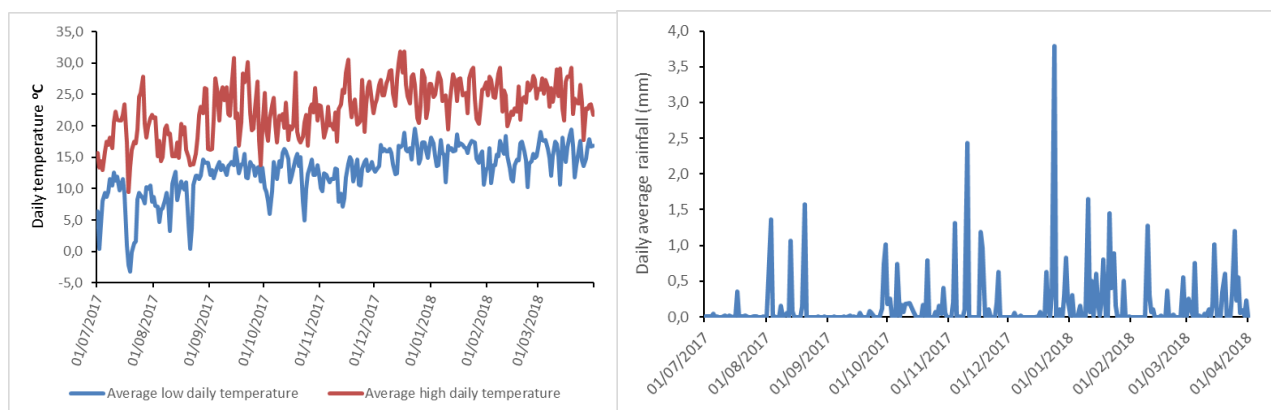

Figure S1 – Data for average daily temperature (left) and daily average rainfall (right) for period when leaves were collected and submitted to hydrodistillation. *Source: INMET-1583 station – Lages, Santa Catarina, Brazil.*

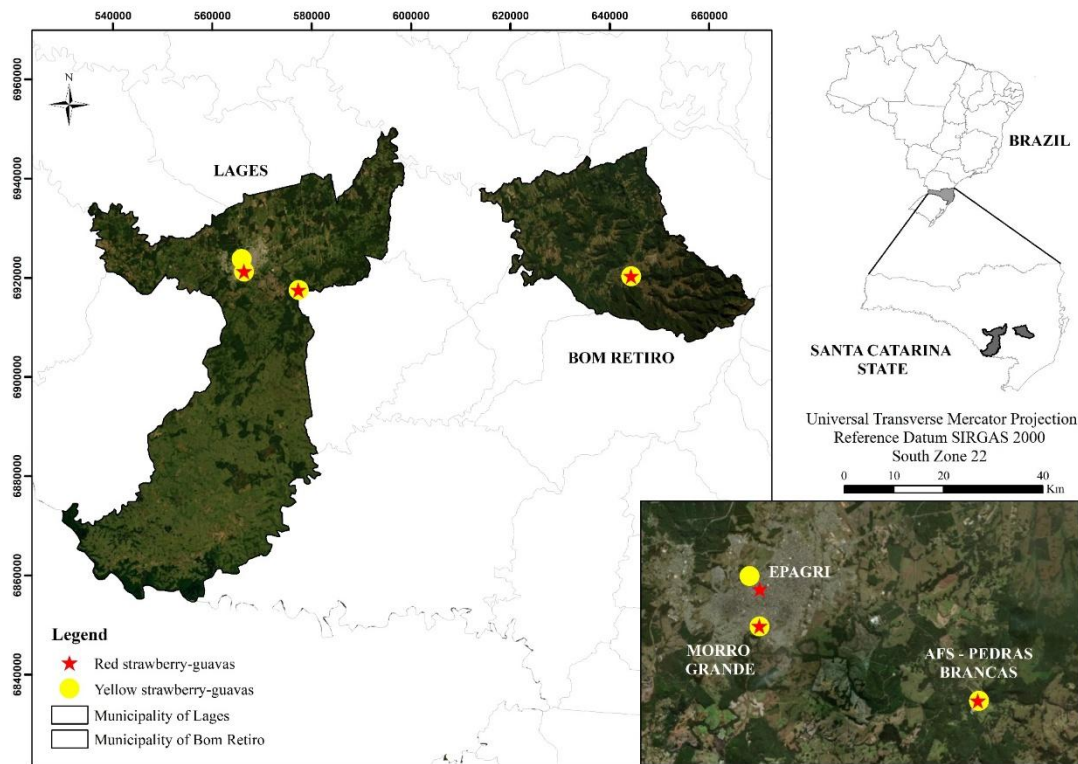

Figure S2 - Map with the sites where the samples of leaves of *Psidium cattleianum* were collected. *Source: Prepared by the authors, 2019*

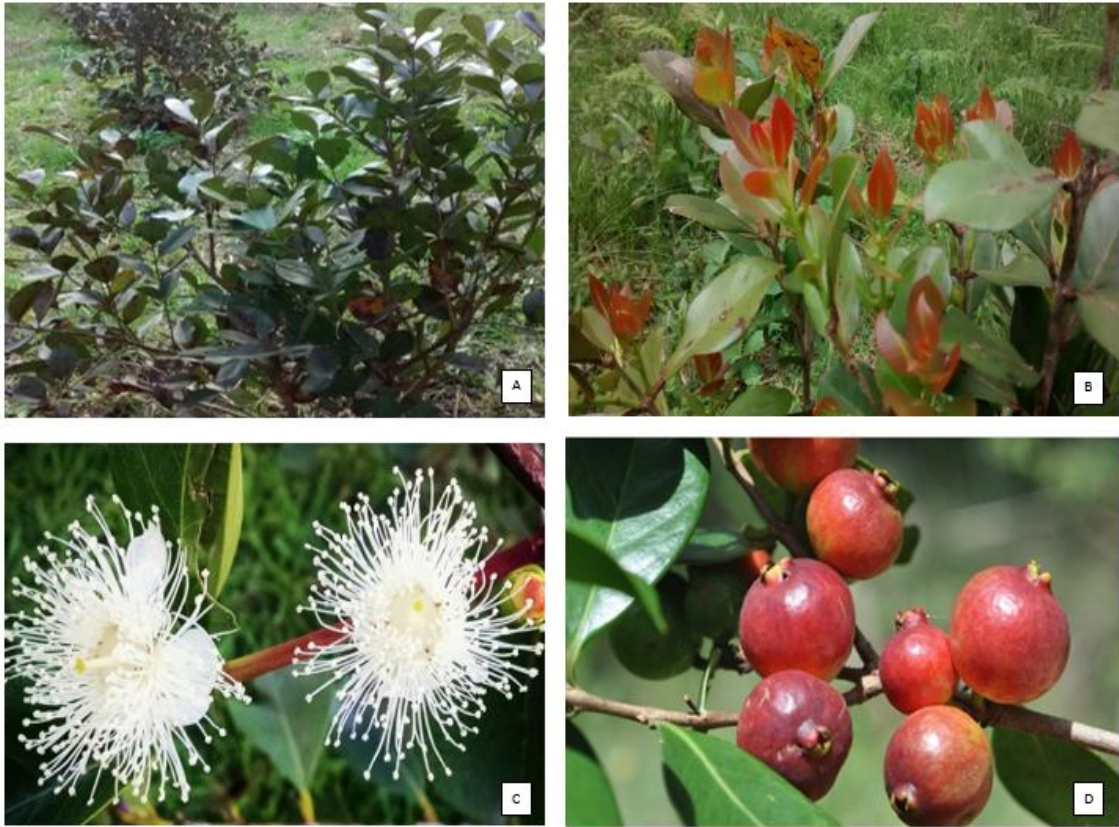

Figure S3 – Pictures of phenological stages for red morphotype of *Psidium cattleyanum*.  
 A) Old leaves (OL); B) Young leaves (YL); C) Flowering (FL); D) Fruiting (FR).  
*Pictures taken by the authors at Pedras Brancas, Lages, SC, Brazil, 2017.*

Table S2 – Schedule for the collection of leaves of *Psidium cattleianum*.

| Phenological stage | Morphotype | Collection date | Location            |
|--------------------|------------|-----------------|---------------------|
| Old leaves (OL)    | Yellow     | 28/07/17        | Epagri (EP)         |
| Old leaves (OL)    | Red        | 31/07/17        | Epagri (EP)         |
| Old leaves (OL)    | Yellow     | 02/08/17        | Morro Grande (MG)   |
| Old leaves (OL)    | Red        | 08/08/17        | Morro Grande (MG)   |
| Old leaves (OL)    | Yellow     | 09/08/17        | Pedras Brancas (PB) |
| Old leaves (OL)    | Red        | 09/08/17        | Pedras Brancas (PB) |
| Old leaves (OL)    | Yellow     | 20/08/17        | Bom Retiro (BR)     |
| Old leaves (OL)    | Red        | 20/08/17        | Bom Retiro (BR)     |
| Young leaves (YL)  | Red        | 23/10/17        | Epagri (EP)         |
| Young leaves (YL)  | Yellow     | 24/10/17        | Epagri (EP)         |
| Young leaves (YL)  | Red        | 26/10/17        | Morro Grande (MG)   |
| Young leaves (YL)  | Yellow     | 27/10/17        | Morro Grande (MG)   |
| Young leaves (YL)  | Red        | 05/11/17        | Bom Retiro (BR)     |
| Young leaves (YL)  | Yellow     | 05/11/17        | Bom Retiro (BR)     |
| Young leaves (YL)  | Yellow     | 12/11/17        | Pedras Brancas (PB) |
| Young leaves (YL)  | Red        | 12/11/17        | Pedras Brancas (PB) |
| Flowering (FL)     | Red        | 27/11/17        | Morro Grande (MG)   |
| Flowering (FL)     | Yellow     | 05/12/17        | Morro Grande (MG)   |
| Flowering (FL)     | Red        | 03/12/17        | Bom Retiro (BR)     |
| Flowering (FL)     | Yellow     | 03/12/17        | Bom Retiro (BR)     |
| Flowering (FL)     | Yellow     | 07/12/17        | Epagri (EP)         |
| Flowering (FL)     | Red        | 11/12/17        | Epagri (EP)         |
| Flowering (FL)     | Yellow     | 11/12/17        | Pedras Brancas (PB) |
| Flowering (FL)     | Red        | 11/12/17        | Pedras Brancas (PB) |
| Fruiting           | Red        | 06/02/18        | Morro Grande (MG)   |
| Fruiting           | Yellow     | 08/02/18        | Morro Grande (MG)   |
| Fruiting           | Red        | 15/02/18        | Epagri (EP)         |
| Fruiting           | Yellow     | 01/03/18        | Epagri (EP)         |
| Fruiting           | Red        | 18/02/18        | Bom Retiro (BR)     |
| Fruiting           | Yellow     | 18/02/18        | Bom Retiro (BR)     |
| Fruiting           | Red        | 08/03/18        | Pedras Brancas (PB) |
| Fruiting           | Yellow     | 08/03/18        | Pedras Brancas (PB) |

### 1.2. Isolation of the essential oil

Essential oils were obtained by hydrodistillation using a 5 liter Clevenger type apparatus. Leaves (230 – 300 g) were selected and washed with water, dried and grounded in small pieces (3 cm). The material was submitted to the extraction in water at boiling temperature for 2 hours. The oil was separated and dried over anhydrous Na<sub>2</sub>SO<sub>4</sub>, filtered and kept in a sealed glass at -22 °C.

### **1.3. Gas chromatography-mass spectrometry (GC-MS) analysis**

Analysis of the chemical constituents were carried out on a Agilent 7890A/5975C gas chromatograph-mass spectrometer (GC-MS) equipped with an Agilent Combi PAL – GC autosampler and a fused silica capillary column (DB-5; 30 m x 0.25 mm x 0.25  $\mu$ m). Solutions of 20  $\mu$ L of essential oil sample in 1.0 ml of hexanes were prepared for injection of 1  $\mu$ L in the GC-MS. For chromatography separation helium was used as carrier gas at flow rate of 1.0 mL min<sup>-1</sup>. The oven temperature was set from 60 °C to 280 °C at rate of 4 °C min<sup>-1</sup>. The split ratio was 1:50. The inlet and GC-MS interface temperatures were kept at 300 °C. The ion source (70 eV) temperature was set at 230 °C (Total ion chromatograms for essential oil from both morphotypes collected at Bom Retiro site are depicted at figures S3-S10). Peaks were manually integrated using G1701EA GC/MSD Chemstation software. Individual components of the essential oil were identified by comparison of their mass spectra and retention indices, relative to those of a series of *n*-alkanes (C7-C30; Sigma Aldrich), with those reported in literature (see tables S1 and S2) (Adams 2007) . The chemical structure of major compounds 1,8-cineole and  $\alpha$ -pinene were confirmed by co-injection of commercially available standards (Sigma-Aldrich).

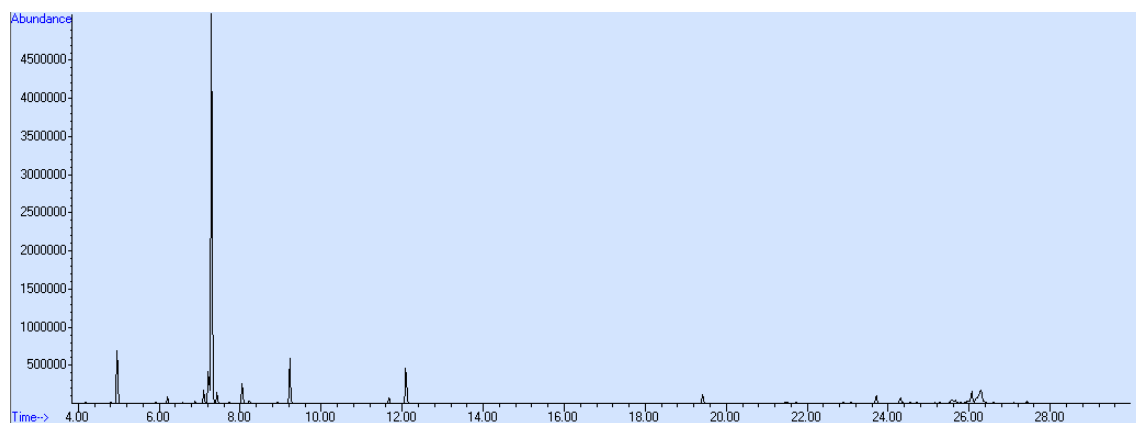

Figure S4 -Total ion chromatogram of the essential oil from the leaves of *Psidium cattleianum*, red morphotype, collected in Bom Retiro at old leaves stage (BROL).

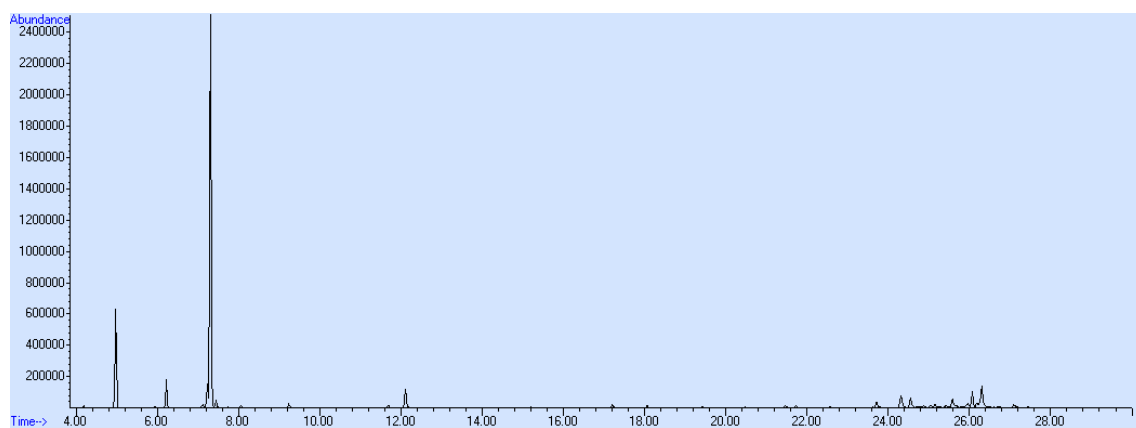

Figure S5 -Total ion chromatogram of the essential oil from the leaves of *Psidium cattleianum*, yellow morphotype, collected in Bom Retiro at old leaves stage (BROL).

Table S3. Chemical constituents from essential oil isolated from leaves of red morphotype of *Psidium cattleianum* for different locations.

| Peak | Substance              | RI<br>exp. | Content (%) / (Local/phenological stage)* |          |          |          |          |          |          |          |          |          |          |          |          |          |          |
|------|------------------------|------------|-------------------------------------------|----------|----------|----------|----------|----------|----------|----------|----------|----------|----------|----------|----------|----------|----------|
|      |                        |            | EP<br>OL                                  | EP<br>YL | EP<br>FL | EP<br>FR | MG<br>OL | MG<br>YL | MG<br>FL | MG<br>FR | BR<br>OL | BR<br>YL | BR<br>FL | BR<br>FR | PB<br>OL | PB<br>YL | PB<br>FR |
| 1    | $\alpha$ -pinene       | 949        | 6.9                                       | 18.4     | 10.2     | 10.8     | 3.2      | 14.5     | 11.5     | 8.2      | 7.3      | 12.5     | 3.7      | 10.6     | 6.8      | 15       | 10.4     |
| 2    | $\beta$ -pinene        | 1003       | 0.3                                       | 0.7      | 1.8      | 0.4      | 0.3      | 0.7      | 0.6      | 0.5      | 0.4      | 0.6      | 0.6      | 0.4      | 0.4      | 0.7      | 0.6      |
| 3    | Myrcene                | 1014       | 2.6                                       | 0.5      | 1.3      | 1.6      | 0.8      | 0.8      | 1.8      | 1.9      | 1.3      | 0.6      | 3.9      | 1.0      | 1.4      | 1.0      | 1.1      |
| 5    | $\alpha$ -phellandrene | 1028       | 0.2                                       | 0.4      | 0.3      | 0.5      | 0.2      | 0.6      | 0.2      | 0.1      | 0.2      | 0.3      | 1.7      | 0.2      | 0.3      | 0.4      | 0.5      |
| 6    | Iso-sylvestrene        | 1032       | 0.1                                       | 0.2      | 0.4      | 0.2      | 0.05     | 0.2      | 1.5      | 1        | 0.6      | 0.1      | 0.05     | 0.1      | 0.1      | 0.2      | 0.3      |
| 7    | $\alpha$ -terpinene    | 1039       | 0.4                                       | 1.0      | 0.3      | 1.0      | 0        | 1.6      | 5.4      | 2.2      | 0.3      | 0.7      | 0.8      | 0.4      | 0.5      | 0.9      | 0.9      |
| 8    | <i>p</i> -cymene       | 1046       | 0.5                                       | 1.3      | 1.0      | 2.2      | 0.8      | 0.0      | 19       | 33.4     | 0.5      | 1.6      | 0.3      | 2.2      | 1.0      | 0.7      | 3.7      |
| 9    | Limonene               | 1050       | 3.7                                       | 3.6      | 3.4      | 5.3      | 2.2      | 3.3      | 2.6      | 2.3      | 2.8      | 2.4      | 5.5      | 3.3      | 3.4      | 3.0      | 4        |
| 10   | 1,8-cineole            | 1053       | 40.4                                      | 4.5      | 24       | 11.5     | 55.8     | 6.8      | 11.5     | 0.5      | 45.2     | 33.8     | 11.5     | 16.3     | 47.9     | 20.6     | 12.8     |
| 11   | (Z)- $\beta$ -ocymene  | 1056       | 0.8                                       | 5.1      | 0.8      | 2.6      | 0.05     | 4.3      | 6.3      | 4.4      | 0.6      | 2.5      | 1        | 2.8      | 0.7      | 3.7      | 5        |
| 12   | (E)- $\beta$ -ocymene  | 1065       | 0.9                                       | 0.3      | 0.3      | 0.4      | 0.1      | 0.4      | 0.4      | 0.6      | 0.5      | 0.4      | 0.2      | 0.4      | 0.4      | 0.6      | 0.7      |
| 13   | $\sigma$ -terpinene    | 1076       | 3.4                                       | 4.8      | 5.1      | 5.6      | 2.4      | 6.2      | 0.5      | 0.4      | 4.1      | 4        | 1.9      | 2.5      | 4.9      | 4.9      | 7.1      |
| 14   | 1,4-pentenyl butyrate  | 1080       | 0.1                                       | 0.2      | 0.3      | 0.1      | 0.9      | 0.6      | 4        | 4.8      | 0.7      | 0.5      | 0.5      | 0.4      | 0.5      | 0.4      | 0.4      |
| 15   | Terpinolene            | 1100       | 0.2                                       | 0.4      | 0.5      | 0.5      | 0.2      | 0.6      | 0.9      | 0.9      | 0.4      | 0.3      | 0.1      | 0.3      | 0.3      | 0.4      | 0.6      |
| 16   | Linalool               | 1111       | 4.2                                       | 5.8      | 4.8      | 2        | 6.6      | 6        | 3        | 4        | 5.6      | 6.5      | 2.0      | 4.4      | 4.7      | 4.3      | 4.8      |
| 17   | 4-terpineol            | 1185       | 1.3                                       | 0.4      | 0.9      | 0.8      | 1.8      | 0.6      | 0.8      | 0.7      | 1.4      | 1.1      | 2.6      | 0.7      | 1.7      | 0.9      | 1.3      |
| 18   | $\alpha$ -terpineol    | 1197       | 4.1                                       | 0.9      | 3.2      | 3.0      | 6.0      | 1.2      | 0.5      | 0.4      | 5.2      | 3.5      | 1.4      | 3.0      | 6.0      | 3.2      | 3.4      |
| 19   | E-caryophyllene        | 1424       | 0.2                                       | 5.8      | 9.2      | 10.8     | 1.5      | 10.9     | 1.2      | 1.2      | 2.6      | 2.6      | 7.6      | 8.6      | 1.9      | 4.8      | 9.7      |
| 20   | $\alpha$ -humulene     | 1458       | 0.2                                       | 0.7      | 0.8      | 1.0      | 0.2      | 1.0      | 0.5      | 0.6      | 0.2      | 0.2      | 0.6      | 0.8      | 0.2      | 0.6      | 0.9      |
| 21   | $\sigma$ -muuroleno    | 1479       | 0.2                                       | 0.7      | 0.6      | 0.6      | 0.1      | 1.0      | 1.8      | 1.5      | 0.2      | 0.3      | 0.6      | 0.6      | 0.4      | 0.6      | 1        |
| 22   | $\beta$ -selinene      | 1489       | 0.2                                       | 2.3      | 1.3      | 1.4      | 0.1      | 2.3      | 1.4      | 0.8      | 0.4      | 0.8      | 0.7      | 1.6      | 0.2      | 1.4      | 2.3      |



|           |                      |      |     |     |     |     |     |     |     |      |     |     |     |     |     |     |     |
|-----------|----------------------|------|-----|-----|-----|-----|-----|-----|-----|------|-----|-----|-----|-----|-----|-----|-----|
| <b>23</b> | $\alpha$ -Selinene   | 1497 | 0.2 | 2.4 | 1.5 | 1.7 | 0.4 | 2.4 | 0.9 | 1.3  | 0.7 | 0.9 | 1.2 | 1.7 | 0.4 | 1.5 | 2.4 |
| <b>24</b> | $\Delta$ -cadinene   | 1526 | 0.2 | 0.8 | 0.6 | 0.7 | 0.1 | 0.9 | 1.4 | 1.3  | 0.3 | 0.3 | 0.5 | 1.0 | 0.1 | 0.5 | 0.7 |
| <b>25</b> | $\alpha$ -cadinene   | 1538 | 0.2 | 3.4 | 2.0 | 2.2 | 0.2 | 3.2 | 1.5 | 1.02 | 0.4 | 1.1 | 1.6 | 2.5 | 0.2 | 1.4 | 2   |
| <b>26</b> | 3,7 (11)-selinadiene | 1545 | 0.2 | 3.3 | 2.0 | 2.2 | 0.2 | 3.2 | 2.7 | 2.2  | 0.4 | 0.8 | 1.6 | 2.4 | 0.2 | 1.4 | 2.2 |
| <b>27</b> | Germacrene B         | 1560 | 0.3 | 5.8 | 0   | 0.3 | 0.1 | 4.5 | 4.6 | 3.8  | 0.0 | 1.4 | 0.7 | 1.7 | 0   | 2.4 | 1.5 |
| <b>28</b> | (E)-nerolidol        | 1566 | 0.3 | 9.8 | 5.7 | 7.6 | 1.4 | 6   | 0.7 | 0.5  | 2.4 | 3.9 | 3.7 | 4.7 | 0.8 | 3.6 | 2.7 |
| <b>29</b> | Globulol             | 1586 | 0.3 | 0.7 | 2.0 | 2.4 | 3.5 | 0.5 | 0.1 | 0.1  | 2.1 | 2.4 | 2.1 | 1.7 | 2.6 | 2.4 | 1.4 |
| <b>30</b> | 1-epi-cubenol        | 1626 | 0.3 | 1.3 | 1.7 | 2.5 | 1.6 | 1.2 | 0.7 | 1.4  | 2.0 | 1.6 | 1.7 | 2.8 | 1.5 | 1.9 | 1.6 |
| <b>31</b> | $\alpha$ -muurolol   | 1642 | 0.3 | 2.1 | 3.0 | 3.6 | 1.5 | 1.9 | 2.4 | 3.6  | 2.8 | 2.1 | 2.4 | 4.6 | 2.2 | 2.4 | 2.9 |
| <b>32</b> | $\alpha$ -eudesmol   | 1650 | 0.3 | 6.6 | 7.3 | 7.7 | 3.2 | 4.4 | 4.6 | 7.7  | 4.5 | 5.6 | 4.6 | 8.8 | 4.8 | 8.1 | 6   |
| <b>33</b> | Valerianol           | 1658 | 0.3 | 1.1 | 0.7 | 0.9 | 0.5 | 4.4 | 0.6 | 0.9  | 0.5 | 0.7 | 0.6 | 1.2 | 0   | 0.7 | 0.7 |

RI: Kovat's Retention Index determined by the normalisation of retention times with respect to a *n*-alkanes mixture. \*EPOL –Epagri, old leaves; EPYL – Epagri, Young leaves; EPFL – Epagri, flowering; EPFR – Epagri, fruiting; MGOL – Morro Grande, old leaves; MGYL – Morro Grande, young leaves; MGFL – Morro Grande, flowering; MGFR – Morro Grande, fruiting; BROL – Bom Retiro, old leaves; BRYL – Bom Retiro, young leaves; BRFL – Bom Retiro, flowering; BRFR – Bom Retiro, fruiting; PBOL – Pedras Brancas, old leaves; PBYL – Pedras Brancas, young leaves; PBFL – Pedras Brancas, flowering.; PBFR - Pedras Brancas, fruiting.

Table S4. Chemical constituents from essential oil isolated from leaves of yellow morphotype of *Psidium cattleianum* for different locations.

| Peak | Substance             | RI<br>exp. | Content (%) / (Local/phenological stage)* |          |          |          |          |          |          |          |          |          |          |          |          |          |
|------|-----------------------|------------|-------------------------------------------|----------|----------|----------|----------|----------|----------|----------|----------|----------|----------|----------|----------|----------|
|      |                       |            | EP<br>OL                                  | EP<br>YL | EP<br>FL | EP<br>FR | MG<br>OL | MG<br>FR | BR<br>OL | BR<br>YL | BR<br>FL | BR<br>FR | PB<br>OL | PB<br>YL | PB<br>FL | PB<br>FR |
| 1    | $\alpha$ -pinene      | 949        | 15.2                                      | 29.1     | 18.4     | 9.4      | 2.8      | 7.2      | 12.6     | 20.0     | 17.9     | 11.1     | 15.0     | 27.5     | 31.8     | 10.4     |
| 2    | $\beta$ -pinene       | 1003       | 0.7                                       | 1.1      | 0.7      | 0.4      | 0.2      | 0.3      | 0.32     | 1        | 0.5      | 0.4      | 1.5      | 2.6      | 2.5      | 0.4      |
| 3    | Myrcene               | 1014       | 13.7                                      | 9.8      | 10.2     | 10.7     | 8.9      | 21.6     | 4.2      | 2.7      | 6.1      | 4.8      | 4.7      | 5.1      | 7.5      | 11.6     |
| 4    | p-cymene              | 1046       | 0.4                                       | 0.2      | 0.1      | 0.1      | 2.2      | 0.1      | 2.3      | 0.2      | 0.1      | 0.1      | 0.8      | 0.2      | 0.2      | 0.2      |
| 5    | Limonene              | 1050       | 1.5                                       | 1.3      | 1.1      | 1.7      | 3.7      | 2.9      | 28.3     | 1.5      | 1.3      | 2.1      | 1.7      | 1.2      | 0.9      | 3.5      |
| 6    | 1,8-cineole           | 1053       | 28.1                                      | 15.9     | 5.0      | 5.3      | 45.5     | 25.8     | 18.4     | 4.8      | 16.3     | 15.1     | 38.8     | 7.9      | 9.9      | 8.7      |
| 7    | (Z)- $\beta$ -ocymene | 1056       | 0.3                                       | 1.8      | 1.0      | 0.5      | 0.7      | 0.9      | 0.6      | 6.8      | 4.7      | 3.0      | 0.5      | 0.4      | 0.4      | 1.1      |
| 8    | $\sigma$ -terpinene   | 1076       | 0.6                                       | 0.6      | 0.6      | 0.7      | 1.8      | 0.9      | 1.0      | 0.3      | 0.5      | 0.6      | 1.8      | 0.4      | 0.4      | 0.7      |
| 9    | Linalool              | 1111       | 0.4                                       | 0.1      | 0.1      | 0.1      | 4.8      | 3.9      | 1.0      | 1.1      | 1.2      | 0.7      | 4.7      | 3.1      | 3.2      | 2.3      |
| 10   | 4-terpineol           | 1185       | 0.4                                       | 0.3      | 0.2      | 0.3      | 1.0      | 0.6      | 0.7      | 0.2      | 0.3      | 0.3      | 1.2      | 0.4      | 0.4      | 0.3      |
| 11   | $\alpha$ -terpineol   | 1197       | 1.7                                       | 0.8      | 1.0      | 1.1      | 3.2      | 2.3      | 3.8      | 0.8      | 1.9      | 1.8      | 4.2      | 1.5      | 1.8      | 1.1      |
| 12   | E-caryophyllene       | 1424       | 5.9                                       | 6.0      | 14.5     | 18.1     | 2.7      | 10.9     | 0.4      | 1.0      | 2.0      | 1.0      | 2.9      | 9.0      | 11.9     | 20.7     |
| 13   | $\alpha$ -Humulene    | 1458       | 0.5                                       | 0.6      | 1.3      | 1.5      | 0.2      | 0.8      | 0.2      | 1.9      | 1.5      | 1.1      | 0.4      | 2.7      | 2.1      | 1.9      |
| 14   | $\beta$ -selinene     | 1489       | 2.2                                       | 4.8      | 6.9      | 6.9      | 0.5      | 1.1      | 0.9      | 7.5      | 5.5      | 3.2      | 0.4      | 3.7      | 2.0      | 3.3      |
| 15   | $\alpha$ -selinene    | 1497       | 1.9                                       | 4.4      | 6.5      | 6.4      | 0.6      | 1.4      | 0.9      | 7.8      | 5.9      | 4.2      | 0.6      | 3.3      | 2.6      | 3.0      |
| 16   | $\Delta$ -cadinene    | 1526       | 0.4                                       | 0.8      | 1.7      | 2.1      | 0.2      | 0.7      | 0.5      | 3.5      | 4.0      | 3.3      | 0.3      | 2.4      | 1.5      | 1.8      |
| 17   | (E)-nerolidol         | 1566       | 1.4                                       | 1.0      | 1.1      | 1.2      | 1.9      | 1.0      | 2.1      | 6.2      | 3.8      | 5.5      | 1.0      | 1.9      | 1.1      | 1.7      |
| 18   | Globulol              | 1586       | 5.6                                       | 2.4      | 3.1      | 3.9      | 4.0      | 0.0      | 0.0      | 1.0      | 3.6      | 2.2      | 1.5      | 3.3      | 5.0      | 3.6      |
| 19   | 1-Epi-cubenol         | 1626       | 2.2                                       | 1.5      | 2.1      | 2.6      | 2.1      | 0.0      | 0.0      | 1.2      | 2.5      | 2.1      | 1.7      | 4.4      | 2.3      | 2.5      |
| 20   | $\alpha$ -muurolol    | 1642       | 0.8                                       | 0.5      | 0.9      | 1.0      | 1.1      | 0.0      | 0.0      | 1.0      | 0.4      | 0.7      | 0.5      | 0.7      | 1.1      | 0.8      |
| 21   | Valerianol            | 1658       | 4.9                                       | 5.6      | 7.2      | 7.9      | 2.7      | 0.0      | 0.0      | 3.8      | 4.6      | 7.6      | 4.2      | 10.1     | 3.7      | 7.2      |

RI: Kovat's Retention Index determined by the normalisation of retention times with respect to a n-alkanes mixture. \*EPOL –Epagri, old leaves; EPYL – Epagri, Young leaves; EPFL – Epagri, flowering; EPFR – Epagri, fruiting; MGOL – Morro Grande, old leaves; MGYL – Morro Grande, young leaves; MGFL – Morro Grande, flowering; MGFR – Morro Grande, fruiting; BROL – Bom Retiro, old leaves; BRYL – Bom Retiro, young leaves; BRFL – Bom Retiro, flowering; BRFR – Bom Retiro, fruiting; PBOL – Pedras Brancas, old leaves; PBYL – Pedras Brancas, young leaves; PBFL – Pedras Brancas, flowering.; PBFR - Pedras Brancas, fruiting.
